# Supplementary material
Source: publisher figshare collection journal article supplement (https://frontiersin.figshare.com/ndownloader/files/26920685)
Supplement: Supplementary file [file 26920685]

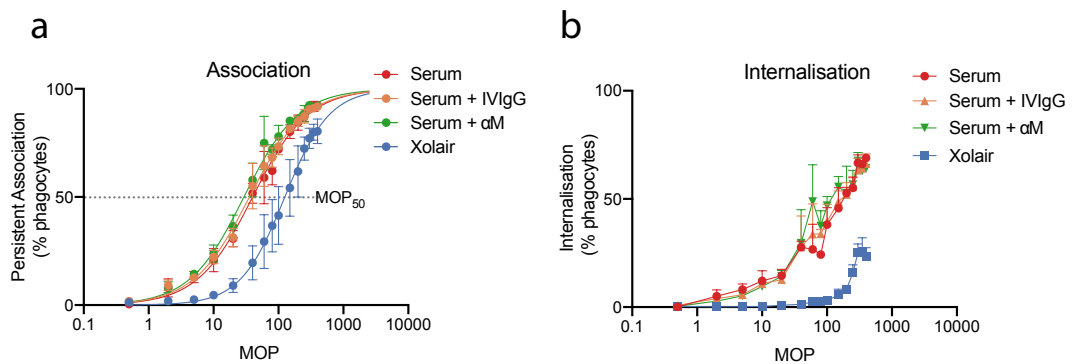

**Fig. S5. Phagocytosis experiments** The figure shows how added monoclonal or pooled IgG affects phagocytosis of *S. pyogenes* in serum. 20  $\mu$ g/ml of either  $\alpha$ M or IVIgG is added to 5% of serum from donor 4. 500  $\mu$ g/ml of Xolair is used here as a baseline for non-Fc-mediated association. These are the full curves used for the data shown in Figure 5. **a.** Association of phagocytes and bacteria treated with different antibody samples. These curves depict the percentage of present phagocytes that have associated with at least one bacteria as a function of the multiplicity of prey (MOP). **b.** The internalisation curves depict the percentage of phagocytes that have internalised one or more bacteria as a function of MOP. The data shown is from three experimental repeats and the error bars indicate standard deviation ( $n = 3$ , mean  $\pm$  SD).
